# Supplementary material
Source: PubMed Central journal article supplement (PMC208791)

Homo sapiens Chromosome 4

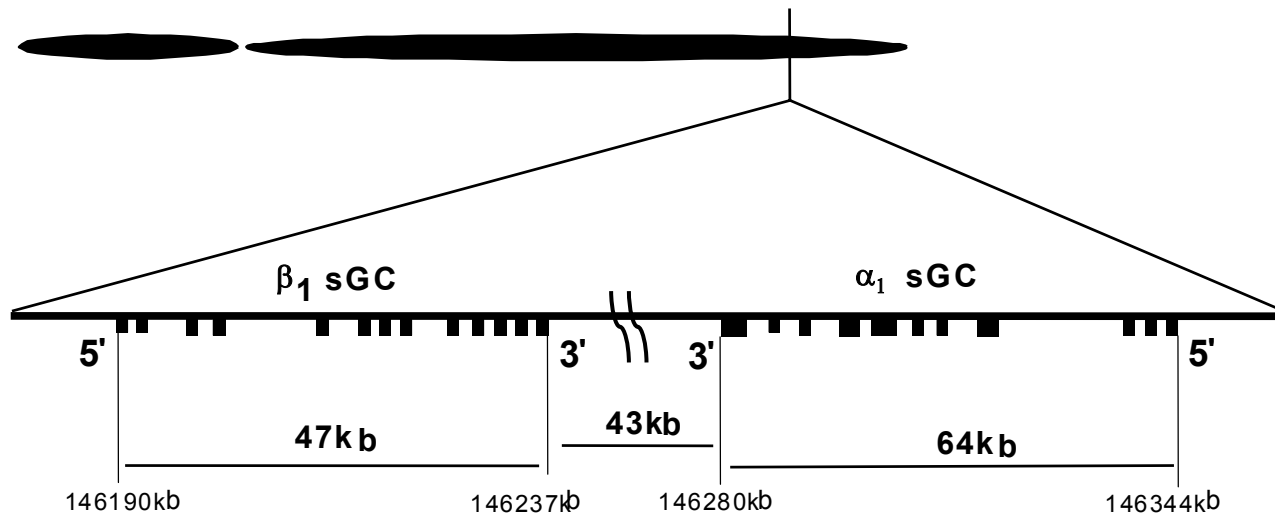

Supplement: pnas_100_20_11523__2.pdf [file pnas_100_20_11523__2.pdf]
